# Supplementary material
Source: publisher figshare collection journal article supplement (https://acs.figshare.com/ndownloader/files/3975922)
Supplement: Supplementary file 1 [file 3975922]

data_xzrvi-159 

_audit_update_record
;
2013-10-10 # Formatted by publCIF

;

# publcif _publ_body_element loop start
loop_
_publ_body_element
_publ_body_title
_publ_body_contents

 section 
;
Introduction
; 
;

;
 section 
;
Experimental
; 
;

;
 subsection 
;
Synthesis and crystallization
; 
;

;
 subsection 
;
Refinement
;
;
Crystal data, data collection and structure refinement details are summarized
in Table 1.
;

 section 
;
Results and discussion
; 
;

;
# publcif _publ_body_element loop end
  
_audit_creation_method            SHELXL-97 
_chemical_name_systematic 
? 
_chemical_name_common             ? 
_chemical_melting_point           ? 
_chemical_formula_moiety 
 'C19 H22 N2 O3' 
_chemical_formula_sum 
 'C19 H22 N2 O3' 
_chemical_formula_weight          326.39 
  
loop_ 
 _atom_type_symbol 
 _atom_type_description 
 _atom_type_scat_dispersion_real 
 _atom_type_scat_dispersion_imag 
 _atom_type_scat_source 
 'C'  'C'   0.0181   0.0091 
 'International Tables Vol C Tables 4.2.6.8 and 6.1.1.4' 
 'H'  'H'   0.0000   0.0000 
 'International Tables Vol C Tables 4.2.6.8 and 6.1.1.4' 
 'N'  'N'   0.0311   0.0180 
 'International Tables Vol C Tables 4.2.6.8 and 6.1.1.4' 
 'O'  'O'   0.0492   0.0322 
 'International Tables Vol C Tables 4.2.6.8 and 6.1.1.4' 
  
_symmetry_cell_setting            monoclinic 
_symmetry_space_group_name_H-M    'P 21/c'
_symmetry_space_group_name_Hall   '-P 2ybc'  
  
loop_ 
 _symmetry_equiv_pos_as_xyz 
 'x, y, z' 
 '-x, y+1/2, -z+1/2' 
 '-x, -y, -z' 
 'x, -y-1/2, z-1/2' 
  
_cell_length_a                    11.54889(9) 
_cell_length_b                    8.77611(7) 
_cell_length_c                    16.11647(13) 
_cell_angle_alpha                 90.00 
_cell_angle_beta                  104.6510(8) 
_cell_angle_gamma                 90.00 
_cell_volume                      1580.36(2) 
_cell_formula_units_Z             4 
_cell_measurement_temperature     140(2) 
_cell_measurement_reflns_used     18946 
_cell_measurement_theta_min       4.2540 
_cell_measurement_theta_max       73.0490 
  
_exptl_crystal_description        prism 
_exptl_crystal_colour             colourless 
_exptl_crystal_size_max           0.50 
_exptl_crystal_size_mid           0.29 
_exptl_crystal_size_min           0.22 
_exptl_crystal_density_meas       ? 
_exptl_crystal_density_diffrn     1.372 
_exptl_crystal_density_method     'not measured' 
_exptl_crystal_F_000              696 
_exptl_absorpt_coefficient_mu     0.754 
_exptl_absorpt_correction_T_min                   0.54033 
_exptl_absorpt_correction_T_max                   1.00000 
_exptl_absorpt_correction_type            multi-scan 
_exptl_absorpt_process_details 
; 
CrysAlisPro, Agilent Technologies, 
Version 1.171.36.28 (release 01-02-2013 CrysAlis171 .NET) 
(compiled Feb  1 2013,16:14:44) 
Empirical absorption correction using spherical harmonics, 
 implemented in SCALE3 ABSPACK scaling algorithm. 
; 
  
_exptl_special_details 
? 
  
_diffrn_ambient_temperature       140(2) 
_diffrn_radiation_wavelength      1.54178 
_diffrn_radiation_type            CuK\a 
_diffrn_radiation_source          'fine-focus sealed tube' 
_diffrn_radiation_monochromator   graphite 
_diffrn_measurement_device_type   'SuperNova, Dual, Cu at zero, Atlas' 
_diffrn_measurement_method        '\w scans' 
_diffrn_detector_area_resol_mean  10.2665 
_diffrn_standards_number          ? 
_diffrn_standards_interval_count  ? 
_diffrn_standards_interval_time   ? 
_diffrn_standards_decay_%         ? 
_diffrn_reflns_number             24927 
_diffrn_reflns_av_R_equivalents   0.0215 
_diffrn_reflns_av_sigmaI/netI     0.0084 
_diffrn_reflns_limit_h_min        -14 
_diffrn_reflns_limit_h_max        14 
_diffrn_reflns_limit_k_min        -10 
_diffrn_reflns_limit_k_max        10 
_diffrn_reflns_limit_l_min        -19 
_diffrn_reflns_limit_l_max        19 
_diffrn_reflns_theta_min          3.96 
_diffrn_reflns_theta_max          73.12 
_reflns_number_total              3136 
_reflns_number_gt                 3089 
_reflns_threshold_expression      >2sigma(I) 
  
_computing_data_collection 
; 
CrysAlisPro, Agilent Technologies, 
Version 1.171.36.28 (release 01-02-2013 CrysAlis171 .NET) 
(compiled Feb  1 2013,16:14:44) 
; 
_computing_cell_refinement 
; 
CrysAlisPro, Agilent Technologies, 
Version 1.171.36.28 (release 01-02-2013 CrysAlis171 .NET) 
(compiled Feb  1 2013,16:14:44) 
; 
_computing_data_reduction 
; 
CrysAlisPro, Agilent Technologies, 
Version 1.171.36.28 (release 01-02-2013 CrysAlis171 .NET) 
(compiled Feb  1 2013,16:14:44) 
; 
_computing_structure_solution     'SHELXS-97 (Sheldrick, 1990)' 
_computing_structure_refinement   'SHELXL-97 (Sheldrick, 1997)' 
_computing_molecular_graphics     'Bruker SHELXTL' 
_computing_publication_material   'Bruker SHELXTL' 
  
_refine_special_details 
; 
 Refinement of F^2^ against ALL reflections.  The weighted R-factor wR and 
 goodness of fit S are based on F^2^, conventional R-factors R are based 
 on F, with F set to zero for negative F^2^. The threshold expression of 
 F^2^ > 2sigma(F^2^) is used only for calculating R-factors(gt) etc. and is 
 not relevant to the choice of reflections for refinement.  R-factors based 
 on F^2^ are statistically about twice as large as those based on F, and R- 
 factors based on ALL data will be even larger. 
; 
  
_refine_ls_structure_factor_coef  Fsqd 
_refine_ls_matrix_type            full 
_refine_ls_weighting_scheme       calc 
_refine_ls_weighting_details 
 'calc w=1/[\s^2^(Fo^2^)+(0.0398P)^2^+0.6142P] where P=(Fo^2^+2Fc^2^)/3' 
_atom_sites_solution_primary      direct 
_atom_sites_solution_secondary    difmap 
_atom_sites_solution_hydrogens    geom 
_refine_ls_hydrogen_treatment     constr 
_refine_ls_extinction_method      SHELXL 
_refine_ls_extinction_coef        0.0028(5) 
_refine_ls_extinction_expression 
 'Fc^*^=kFc[1+0.001xFc^2^\l^3^/sin(2\q)]^-1/4^' 
_refine_ls_number_reflns          3136 
_refine_ls_number_parameters      218 
_refine_ls_number_restraints      0 
_refine_ls_R_factor_all           0.0339 
_refine_ls_R_factor_gt            0.0335 
_refine_ls_wR_factor_ref          0.0855 
_refine_ls_wR_factor_gt           0.0851 
_refine_ls_goodness_of_fit_ref    1.051 
_refine_ls_restrained_S_all       1.051 
_refine_ls_shift/su_max           0.000 
_refine_ls_shift/su_mean          0.000 
  
loop_ 
 _atom_site_label 
 _atom_site_type_symbol 
 _atom_site_fract_x 
 _atom_site_fract_y 
 _atom_site_fract_z 
 _atom_site_U_iso_or_equiv 
 _atom_site_adp_type 
 _atom_site_occupancy 
 _atom_site_symmetry_multiplicity 
 _atom_site_calc_flag 
 _atom_site_refinement_flags 
 _atom_site_disorder_assembly 
 _atom_site_disorder_group 
O1 O 0.44182(7) 0.29648(9) 0.43407(5) 0.0268(2) Uani 1 1 d . . . 
O2 O -0.05701(7) 0.28112(11) 0.44415(6) 0.0348(2) Uani 1 1 d . . . 
O3 O 0.22716(7) 0.06620(9) 0.34560(5) 0.0294(2) Uani 1 1 d . . . 
N1 N 0.27940(8) 0.07588(10) 0.48998(6) 0.0220(2) Uani 1 1 d . . . 
N2 N 0.13952(7) 0.28392(10) 0.44266(6) 0.0203(2) Uani 1 1 d . . . 
C1 C 0.26457(9) 0.24195(12) 0.48597(7) 0.0194(2) Uani 1 1 d . . . 
C2 C 0.29750(9) 0.31385(12) 0.57730(7) 0.0204(2) Uani 1 1 d . . . 
C3 C 0.42350(10) 0.26166(13) 0.62732(7) 0.0258(2) Uani 1 1 d . . . 
H3A H 0.4837 0.3268 0.6104 0.031 Uiso 1 1 calc R . . 
H3B H 0.4315 0.2777 0.6893 0.031 Uiso 1 1 calc R . . 
C4 C 0.45166(11) 0.09421(14) 0.61286(8) 0.0316(3) Uani 1 1 d . . . 
H4A H 0.5083 0.0897 0.5759 0.038 Uiso 1 1 calc R . . 
H4B H 0.4913 0.0473 0.6687 0.038 Uiso 1 1 calc R . . 
C5 C 0.34112(10) 0.00330(13) 0.57149(7) 0.0272(3) Uani 1 1 d . . . 
H5A H 0.3639 -0.1022 0.5608 0.033 Uiso 1 1 calc R . . 
H5B H 0.2870 -0.0009 0.6103 0.033 Uiso 1 1 calc R . . 
C6 C 0.33538(9) 0.31415(12) 0.42553(7) 0.0205(2) Uani 1 1 d . . . 
C7 C 0.24991(9) 0.40488(12) 0.36174(7) 0.0209(2) Uani 1 1 d . . . 
C8 C 0.26913(10) 0.50055(12) 0.29799(7) 0.0240(2) Uani 1 1 d . . . 
H8 H 0.3475 0.5164 0.2911 0.029 Uiso 1 1 calc R . . 
C9 C 0.17123(11) 0.57254(13) 0.24455(7) 0.0273(3) Uani 1 1 d . . . 
H9 H 0.1823 0.6402 0.2012 0.033 Uiso 1 1 calc R . . 
C10 C 0.05654(11) 0.54543(13) 0.25457(7) 0.0279(3) Uani 1 1 d . . . 
H10 H -0.0096 0.5946 0.2170 0.033 Uiso 1 1 calc R . . 
C11 C 0.03568(10) 0.44895(13) 0.31770(7) 0.0252(2) Uani 1 1 d . . . 
H11 H -0.0430 0.4306 0.3234 0.030 Uiso 1 1 calc R . . 
C12 C 0.13502(9) 0.38022(12) 0.37228(7) 0.0210(2) Uani 1 1 d . . . 
C13 C 0.04728(10) 0.25348(13) 0.47984(7) 0.0247(2) Uani 1 1 d . . . 
C14 C 0.08833(10) 0.18530(14) 0.56797(7) 0.0271(3) Uani 1 1 d . . . 
H14A H 0.1074 0.0763 0.5627 0.032 Uiso 1 1 calc R . . 
H14B H 0.0223 0.1913 0.5969 0.032 Uiso 1 1 calc R . . 
C15 C 0.19908(10) 0.26638(13) 0.62363(7) 0.0250(2) Uani 1 1 d . . . 
H15A H 0.2364 0.1985 0.6721 0.030 Uiso 1 1 calc R . . 
H15B H 0.1720 0.3591 0.6482 0.030 Uiso 1 1 calc R . . 
C16 C 0.25177(9) -0.00222(13) 0.41411(7) 0.0245(2) Uani 1 1 d . . . 
C17 C 0.24705(12) -0.17372(14) 0.41832(9) 0.0352(3) Uani 1 1 d . . . 
H17A H 0.2053 -0.2140 0.3620 0.053 Uiso 1 1 calc R . . 
H17B H 0.2041 -0.2041 0.4609 0.053 Uiso 1 1 calc R . . 
H17C H 0.3287 -0.2145 0.4348 0.053 Uiso 1 1 calc R . . 
C18 C 0.29659(10) 0.48956(12) 0.56856(7) 0.0235(2) Uani 1 1 d . . . 
H18A H 0.3503 0.5187 0.5321 0.028 Uiso 1 1 calc R . . 
H18B H 0.2147 0.5228 0.5389 0.028 Uiso 1 1 calc R . . 
C19 C 0.33574(11) 0.57449(13) 0.65392(7) 0.0291(3) Uani 1 1 d . . . 
H19A H 0.2908 0.5358 0.6936 0.044 Uiso 1 1 calc R . . 
H19B H 0.3199 0.6836 0.6443 0.044 Uiso 1 1 calc R . . 
H19C H 0.4215 0.5584 0.6786 0.044 Uiso 1 1 calc R . . 
  
loop_ 
 _atom_site_aniso_label 
 _atom_site_aniso_U_11 
 _atom_site_aniso_U_22 
 _atom_site_aniso_U_33 
 _atom_site_aniso_U_23 
 _atom_site_aniso_U_13 
 _atom_site_aniso_U_12 
O1 0.0194(4) 0.0324(4) 0.0295(4) 0.0010(3) 0.0079(3) 0.0011(3) 
O2 0.0184(4) 0.0498(5) 0.0362(5) 0.0040(4) 0.0067(3) 0.0030(4) 
O3 0.0296(4) 0.0305(4) 0.0275(4) -0.0057(3) 0.0064(3) 0.0016(3) 
N1 0.0223(4) 0.0178(4) 0.0261(5) 0.0003(3) 0.0062(4) 0.0021(3) 
N2 0.0164(4) 0.0221(4) 0.0221(4) 0.0005(3) 0.0042(3) 0.0017(3) 
C1 0.0164(5) 0.0195(5) 0.0221(5) 0.0001(4) 0.0044(4) 0.0016(4) 
C2 0.0204(5) 0.0212(5) 0.0197(5) 0.0000(4) 0.0050(4) 0.0014(4) 
C3 0.0228(5) 0.0289(6) 0.0236(5) -0.0003(4) 0.0020(4) 0.0024(4) 
C4 0.0279(6) 0.0312(6) 0.0319(6) 0.0023(5) 0.0005(5) 0.0090(5) 
C5 0.0311(6) 0.0213(5) 0.0294(6) 0.0047(4) 0.0079(5) 0.0060(4) 
C6 0.0214(5) 0.0198(5) 0.0207(5) -0.0034(4) 0.0062(4) -0.0007(4) 
C7 0.0232(5) 0.0197(5) 0.0195(5) -0.0039(4) 0.0050(4) 0.0004(4) 
C8 0.0298(6) 0.0216(5) 0.0215(5) -0.0044(4) 0.0081(4) -0.0017(4) 
C9 0.0401(6) 0.0212(5) 0.0200(5) -0.0009(4) 0.0068(5) 0.0016(5) 
C10 0.0331(6) 0.0232(5) 0.0228(5) -0.0022(4) -0.0012(4) 0.0059(5) 
C11 0.0231(5) 0.0241(5) 0.0259(5) -0.0032(4) 0.0017(4) 0.0026(4) 
C12 0.0228(5) 0.0193(5) 0.0202(5) -0.0035(4) 0.0039(4) 0.0010(4) 
C13 0.0200(5) 0.0263(6) 0.0285(6) -0.0013(4) 0.0078(4) 0.0000(4) 
C14 0.0232(5) 0.0300(6) 0.0307(6) 0.0042(5) 0.0117(4) -0.0002(4) 
C15 0.0271(5) 0.0258(5) 0.0241(5) 0.0020(4) 0.0103(4) 0.0017(4) 
C16 0.0189(5) 0.0246(6) 0.0309(6) -0.0047(4) 0.0080(4) 0.0000(4) 
C17 0.0368(7) 0.0230(6) 0.0478(7) -0.0085(5) 0.0144(6) -0.0033(5) 
C18 0.0274(5) 0.0206(5) 0.0228(5) -0.0006(4) 0.0071(4) 0.0007(4) 
C19 0.0357(6) 0.0251(6) 0.0270(6) -0.0046(4) 0.0085(5) -0.0009(5) 
  
_geom_special_details 
; 
 All esds (except the esd in the dihedral angle between two l.s. planes) 
 are estimated using the full covariance matrix.  The cell esds are taken 
 into account individually in the estimation of esds in distances, angles 
 and torsion angles; correlations between esds in cell parameters are only 
 used when they are defined by crystal symmetry.  An approximate (isotropic) 
 treatment of cell esds is used for estimating esds involving l.s. planes. 
; 
  
loop_ 
 _geom_bond_atom_site_label_1 
 _geom_bond_atom_site_label_2 
 _geom_bond_distance 
 _geom_bond_site_symmetry_2 
 _geom_bond_publ_flag 
O1 C6 1.2118(13) . ? 
O2 C13 1.2206(14) . ? 
O3 C16 1.2255(14) . ? 
N1 C16 1.3673(14) . ? 
N1 C1 1.4670(13) . ? 
N1 C5 1.4717(14) . ? 
N2 C13 1.3742(14) . ? 
N2 C12 1.4049(14) . ? 
N2 C1 1.4829(12) . ? 
C1 C6 1.5563(14) . ? 
C1 C2 1.5575(14) . ? 
C2 C3 1.5439(14) . ? 
C2 C18 1.5482(14) . ? 
C2 C15 1.5660(14) . ? 
C3 C4 1.5356(16) . ? 
C3 H3A 0.9900 . ? 
C3 H3B 0.9900 . ? 
C4 C5 1.5100(17) . ? 
C4 H4A 0.9900 . ? 
C4 H4B 0.9900 . ? 
C5 H5A 0.9900 . ? 
C5 H5B 0.9900 . ? 
C6 C7 1.4669(15) . ? 
C7 C8 1.3875(15) . ? 
C7 C12 1.3966(15) . ? 
C8 C9 1.3881(16) . ? 
C8 H8 0.9500 . ? 
C9 C10 1.3946(17) . ? 
C9 H9 0.9500 . ? 
C10 C11 1.3908(17) . ? 
C10 H10 0.9500 . ? 
C11 C12 1.3940(15) . ? 
C11 H11 0.9500 . ? 
C13 C14 1.5031(16) . ? 
C14 C15 1.5384(16) . ? 
C14 H14A 0.9900 . ? 
C14 H14B 0.9900 . ? 
C15 H15A 0.9900 . ? 
C15 H15B 0.9900 . ? 
C16 C17 1.5082(16) . ? 
C17 H17A 0.9800 . ? 
C17 H17B 0.9800 . ? 
C17 H17C 0.9800 . ? 
C18 C19 1.5289(15) . ? 
C18 H18A 0.9900 . ? 
C18 H18B 0.9900 . ? 
C19 H19A 0.9800 . ? 
C19 H19B 0.9800 . ? 
C19 H19C 0.9800 . ? 
  
loop_ 
 _geom_angle_atom_site_label_1 
 _geom_angle_atom_site_label_2 
 _geom_angle_atom_site_label_3 
 _geom_angle 
 _geom_angle_site_symmetry_1 
 _geom_angle_site_symmetry_3 
 _geom_angle_publ_flag 
C16 N1 C1 117.42(9) . . ? 
C16 N1 C5 122.15(9) . . ? 
C1 N1 C5 119.61(9) . . ? 
C13 N2 C12 126.49(9) . . ? 
C13 N2 C1 121.10(9) . . ? 
C12 N2 C1 111.24(8) . . ? 
N1 C1 N2 110.88(8) . . ? 
N1 C1 C6 110.98(8) . . ? 
N2 C1 C6 101.98(8) . . ? 
N1 C1 C2 111.29(8) . . ? 
N2 C1 C2 108.67(8) . . ? 
C6 C1 C2 112.66(8) . . ? 
C3 C2 C18 109.07(9) . . ? 
C3 C2 C1 110.23(8) . . ? 
C18 C2 C1 108.85(8) . . ? 
C3 C2 C15 111.96(9) . . ? 
C18 C2 C15 108.62(8) . . ? 
C1 C2 C15 108.04(8) . . ? 
C4 C3 C2 114.36(9) . . ? 
C4 C3 H3A 108.7 . . ? 
C2 C3 H3A 108.7 . . ? 
C4 C3 H3B 108.7 . . ? 
C2 C3 H3B 108.7 . . ? 
H3A C3 H3B 107.6 . . ? 
C5 C4 C3 112.63(9) . . ? 
C5 C4 H4A 109.1 . . ? 
C3 C4 H4A 109.1 . . ? 
C5 C4 H4B 109.1 . . ? 
C3 C4 H4B 109.1 . . ? 
H4A C4 H4B 107.8 . . ? 
N1 C5 C4 109.27(9) . . ? 
N1 C5 H5A 109.8 . . ? 
C4 C5 H5A 109.8 . . ? 
N1 C5 H5B 109.8 . . ? 
C4 C5 H5B 109.8 . . ? 
H5A C5 H5B 108.3 . . ? 
O1 C6 C7 129.24(10) . . ? 
O1 C6 C1 123.73(9) . . ? 
C7 C6 C1 107.02(8) . . ? 
C8 C7 C12 121.24(10) . . ? 
C8 C7 C6 129.95(10) . . ? 
C12 C7 C6 108.80(9) . . ? 
C7 C8 C9 118.50(10) . . ? 
C7 C8 H8 120.7 . . ? 
C9 C8 H8 120.7 . . ? 
C8 C9 C10 119.92(11) . . ? 
C8 C9 H9 120.0 . . ? 
C10 C9 H9 120.0 . . ? 
C11 C10 C9 122.27(10) . . ? 
C11 C10 H10 118.9 . . ? 
C9 C10 H10 118.9 . . ? 
C10 C11 C12 117.24(10) . . ? 
C10 C11 H11 121.4 . . ? 
C12 C11 H11 121.4 . . ? 
C11 C12 C7 120.79(10) . . ? 
C11 C12 N2 128.77(10) . . ? 
C7 C12 N2 110.43(9) . . ? 
O2 C13 N2 122.49(11) . . ? 
O2 C13 C14 124.21(10) . . ? 
N2 C13 C14 113.30(9) . . ? 
C13 C14 C15 112.58(9) . . ? 
C13 C14 H14A 109.1 . . ? 
C15 C14 H14A 109.1 . . ? 
C13 C14 H14B 109.1 . . ? 
C15 C14 H14B 109.1 . . ? 
H14A C14 H14B 107.8 . . ? 
C14 C15 C2 116.21(9) . . ? 
C14 C15 H15A 108.2 . . ? 
C2 C15 H15A 108.2 . . ? 
C14 C15 H15B 108.2 . . ? 
C2 C15 H15B 108.2 . . ? 
H15A C15 H15B 107.4 . . ? 
O3 C16 N1 120.58(10) . . ? 
O3 C16 C17 121.78(11) . . ? 
N1 C16 C17 117.58(10) . . ? 
C16 C17 H17A 109.5 . . ? 
C16 C17 H17B 109.5 . . ? 
H17A C17 H17B 109.5 . . ? 
C16 C17 H17C 109.5 . . ? 
H17A C17 H17C 109.5 . . ? 
H17B C17 H17C 109.5 . . ? 
C19 C18 C2 114.21(9) . . ? 
C19 C18 H18A 108.7 . . ? 
C2 C18 H18A 108.7 . . ? 
C19 C18 H18B 108.7 . . ? 
C2 C18 H18B 108.7 . . ? 
H18A C18 H18B 107.6 . . ? 
C18 C19 H19A 109.5 . . ? 
C18 C19 H19B 109.5 . . ? 
H19A C19 H19B 109.5 . . ? 
C18 C19 H19C 109.5 . . ? 
H19A C19 H19C 109.5 . . ? 
H19B C19 H19C 109.5 . . ? 
  
loop_ 
 _geom_torsion_atom_site_label_1 
 _geom_torsion_atom_site_label_2 
 _geom_torsion_atom_site_label_3 
 _geom_torsion_atom_site_label_4 
 _geom_torsion 
 _geom_torsion_site_symmetry_1 
 _geom_torsion_site_symmetry_2 
 _geom_torsion_site_symmetry_3 
 _geom_torsion_site_symmetry_4 
 _geom_torsion_publ_flag 
C16 N1 C1 N2 57.98(12) . . . . ? 
C5 N1 C1 N2 -132.22(9) . . . . ? 
C16 N1 C1 C6 -54.62(12) . . . . ? 
C5 N1 C1 C6 115.19(10) . . . . ? 
C16 N1 C1 C2 179.07(8) . . . . ? 
C5 N1 C1 C2 -11.13(13) . . . . ? 
C13 N2 C1 N1 67.84(12) . . . . ? 
C12 N2 C1 N1 -123.78(9) . . . . ? 
C13 N2 C1 C6 -173.95(9) . . . . ? 
C12 N2 C1 C6 -5.57(10) . . . . ? 
C13 N2 C1 C2 -54.78(12) . . . . ? 
C12 N2 C1 C2 113.60(9) . . . . ? 
N1 C1 C2 C3 52.91(11) . . . . ? 
N2 C1 C2 C3 175.28(8) . . . . ? 
C6 C1 C2 C3 -72.48(11) . . . . ? 
N1 C1 C2 C18 172.50(8) . . . . ? 
N2 C1 C2 C18 -65.13(10) . . . . ? 
C6 C1 C2 C18 47.11(11) . . . . ? 
N1 C1 C2 C15 -69.72(10) . . . . ? 
N2 C1 C2 C15 52.65(10) . . . . ? 
C6 C1 C2 C15 164.89(8) . . . . ? 
C18 C2 C3 C4 -158.57(10) . . . . ? 
C1 C2 C3 C4 -39.11(13) . . . . ? 
C15 C2 C3 C4 81.19(12) . . . . ? 
C2 C3 C4 C5 -14.94(14) . . . . ? 
C16 N1 C5 C4 125.50(11) . . . . ? 
C1 N1 C5 C4 -43.81(13) . . . . ? 
C3 C4 C5 N1 56.64(13) . . . . ? 
N1 C1 C6 O1 -55.96(13) . . . . ? 
N2 C1 C6 O1 -174.10(10) . . . . ? 
C2 C1 C6 O1 69.59(13) . . . . ? 
N1 C1 C6 C7 125.28(9) . . . . ? 
N2 C1 C6 C7 7.14(10) . . . . ? 
C2 C1 C6 C7 -109.17(9) . . . . ? 
O1 C6 C7 C8 -4.15(19) . . . . ? 
C1 C6 C7 C8 174.52(10) . . . . ? 
O1 C6 C7 C12 174.82(11) . . . . ? 
C1 C6 C7 C12 -6.51(11) . . . . ? 
C12 C7 C8 C9 0.25(15) . . . . ? 
C6 C7 C8 C9 179.12(10) . . . . ? 
C7 C8 C9 C10 -1.29(16) . . . . ? 
C8 C9 C10 C11 0.83(17) . . . . ? 
C9 C10 C11 C12 0.70(16) . . . . ? 
C10 C11 C12 C7 -1.74(15) . . . . ? 
C10 C11 C12 N2 177.23(10) . . . . ? 
C8 C7 C12 C11 1.31(16) . . . . ? 
C6 C7 C12 C11 -177.78(9) . . . . ? 
C8 C7 C12 N2 -177.84(9) . . . . ? 
C6 C7 C12 N2 3.07(12) . . . . ? 
C13 N2 C12 C11 -9.57(18) . . . . ? 
C1 N2 C12 C11 -177.19(10) . . . . ? 
C13 N2 C12 C7 169.49(10) . . . . ? 
C1 N2 C12 C7 1.88(12) . . . . ? 
C12 N2 C13 O2 16.54(18) . . . . ? 
C1 N2 C13 O2 -176.96(10) . . . . ? 
C12 N2 C13 C14 -162.85(10) . . . . ? 
C1 N2 C13 C14 3.65(14) . . . . ? 
O2 C13 C14 C15 -135.30(12) . . . . ? 
N2 C13 C14 C15 44.08(13) . . . . ? 
C13 C14 C15 C2 -40.23(13) . . . . ? 
C3 C2 C15 C14 -130.18(10) . . . . ? 
C18 C2 C15 C14 109.31(11) . . . . ? 
C1 C2 C15 C14 -8.62(12) . . . . ? 
C1 N1 C16 O3 7.01(14) . . . . ? 
C5 N1 C16 O3 -162.52(10) . . . . ? 
C1 N1 C16 C17 -170.10(9) . . . . ? 
C5 N1 C16 C17 20.38(15) . . . . ? 
C3 C2 C18 C19 -55.81(12) . . . . ? 
C1 C2 C18 C19 -176.12(9) . . . . ? 
C15 C2 C18 C19 66.47(12) . . . . ? 
  
_diffrn_measured_fraction_theta_max    0.993 
_diffrn_reflns_theta_full              73.12 
_diffrn_measured_fraction_theta_full   0.993 
_refine_diff_density_max    0.340 
_refine_diff_density_min   -0.161 
_refine_diff_density_rms    0.035 

_iucr_refine_instructions_details
;
TITL XZRVI-159 in P2(1)/c
CELL 1.54178  11.548887   8.776116  16.116466  90.0000 104.6510  90.0000
ZERR    4.00   0.000093   0.000066   0.000133   0.0000   0.0008   0.0000
LATT  1
SYMM -X, 0.5+Y, 0.5-Z
SFAC C H N O
UNIT 76 88 8 12
REM   -------------------------------------------------------------------------
REM   Data measured on the SUPERNOVA
REM   Crystal colour: colourless; Crystal habit: prismatic
REM   -------------------------------------------------------------------------
L.S.  10
ACTA
CONF
SIZE  0.5001 0.2893 0.2171
WPDB -2
BOND  $H
FMAP  2
PLAN  10
TEMP -133
WGHT    0.039800    0.614200
EXTI    0.002789
FVAR       9.16338
O1    4    0.441819    0.296481    0.434072    11.00000    0.01937    0.03240 =
         0.02948    0.00103    0.00788    0.00109
O2    4   -0.057013    0.281123    0.444150    11.00000    0.01845    0.04983 =
         0.03615    0.00397    0.00674    0.00300
O3    4    0.227157    0.066199    0.345596    11.00000    0.02964    0.03054 =
         0.02750   -0.00565    0.00638    0.00155
N1    3    0.279396    0.075883    0.489980    11.00000    0.02226    0.01779 =
         0.02610    0.00026    0.00616    0.00207
N2    3    0.139517    0.283923    0.442656    11.00000    0.01635    0.02209 =
         0.02211    0.00050    0.00421    0.00167
C1    1    0.264574    0.241954    0.485974    11.00000    0.01642    0.01946 =
         0.02215    0.00009    0.00437    0.00158
C2    1    0.297499    0.313854    0.577298    11.00000    0.02035    0.02122 =
         0.01969   -0.00002    0.00496    0.00145
C3    1    0.423497    0.261664    0.627315    11.00000    0.02285    0.02889 =
         0.02362   -0.00031    0.00203    0.00243
AFIX  23
H3A   2    0.483717    0.326768    0.610419    11.00000   -1.20000
H3B   2    0.431531    0.277733    0.689317    11.00000   -1.20000
AFIX   0
C4    1    0.451661    0.094211    0.612858    11.00000    0.02791    0.03116 =
         0.03188    0.00226    0.00054    0.00902
AFIX  23
H4A   2    0.508273    0.089727    0.575928    11.00000   -1.20000
H4B   2    0.491298    0.047342    0.668693    11.00000   -1.20000
AFIX   0
C5    1    0.341120    0.003302    0.571492    11.00000    0.03106    0.02125 =
         0.02938    0.00467    0.00787    0.00601
AFIX  23
H5A   2    0.363898   -0.102243    0.560761    11.00000   -1.20000
H5B   2    0.287012   -0.000911    0.610274    11.00000   -1.20000
AFIX   0
C6    1    0.335382    0.314149    0.425527    11.00000    0.02144    0.01977 =
         0.02071   -0.00342    0.00623   -0.00073
C7    1    0.249914    0.404876    0.361739    11.00000    0.02323    0.01968 =
         0.01945   -0.00388    0.00502    0.00043
C8    1    0.269128    0.500550    0.297990    11.00000    0.02979    0.02158 =
         0.02151   -0.00442    0.00814   -0.00168
AFIX  43
H8    2    0.347519    0.516432    0.291076    11.00000   -1.20000
AFIX   0
C9    1    0.171227    0.572537    0.244546    11.00000    0.04011    0.02121 =
         0.02002   -0.00094    0.00678    0.00159
AFIX  43
H9    2    0.182329    0.640192    0.201192    11.00000   -1.20000
AFIX   0
C10   1    0.056545    0.545429    0.254567    11.00000    0.03310    0.02324 =
         0.02284   -0.00216   -0.00121    0.00591
AFIX  43
H10   2   -0.009603    0.594559    0.216971    11.00000   -1.20000
AFIX   0
C11   1    0.035678    0.448952    0.317703    11.00000    0.02310    0.02407 =
         0.02589   -0.00319    0.00172    0.00256
AFIX  43
H11   2   -0.043020    0.430649    0.323400    11.00000   -1.20000
AFIX   0
C12   1    0.135017    0.380224    0.372276    11.00000    0.02284    0.01926 =
         0.02020   -0.00347    0.00394    0.00103
C13   1    0.047278    0.253480    0.479844    11.00000    0.02004    0.02628 =
         0.02853   -0.00135    0.00778   -0.00003
C14   1    0.088329    0.185300    0.567968    11.00000    0.02316    0.03003 =
         0.03067    0.00420    0.01170   -0.00019
AFIX  23
H14A  2    0.107401    0.076319    0.562664    11.00000   -1.20000
H14B  2    0.022320    0.191258    0.596851    11.00000   -1.20000
AFIX   0
C15   1    0.199078    0.266380    0.623631    11.00000    0.02713    0.02575 =
         0.02406    0.00196    0.01029    0.00170
AFIX  23
H15A  2    0.236353    0.198459    0.672071    11.00000   -1.20000
H15B  2    0.171951    0.359147    0.648173    11.00000   -1.20000
AFIX   0
C16   1    0.251774   -0.002217    0.414109    11.00000    0.01890    0.02457 =
         0.03088   -0.00472    0.00797    0.00004
C17   1    0.247055   -0.173716    0.418318    11.00000    0.03681    0.02295 =
         0.04783   -0.00846    0.01443   -0.00334
AFIX  33
H17A  2    0.205310   -0.214010    0.361982    11.00000   -1.50000
H17B  2    0.204116   -0.204083    0.460913    11.00000   -1.50000
H17C  2    0.328672   -0.214489    0.434793    11.00000   -1.50000
AFIX   0
C18   1    0.296591    0.489563    0.568562    11.00000    0.02740    0.02064 =
         0.02284   -0.00055    0.00706    0.00072
AFIX  23
H18A  2    0.350322    0.518735    0.532113    11.00000   -1.20000
H18B  2    0.214666    0.522753    0.538854    11.00000   -1.20000
AFIX   0
C19   1    0.335744    0.574488    0.653916    11.00000    0.03565    0.02510 =
         0.02699   -0.00462    0.00853   -0.00086
AFIX  33
H19A  2    0.290846    0.535831    0.693586    11.00000   -1.50000
H19B  2    0.319938    0.683625    0.644304    11.00000   -1.50000
H19C  2    0.421544    0.558442    0.678569    11.00000   -1.50000
HKLF  4
 
REM  XZRVI-159 in P2(1)/c
REM R1 =  0.0335 for   3089 Fo > 4sig(Fo)  and  0.0339 for all   3136 data
REM    218 parameters refined using      0 restraints
 
END  
     
WGHT      0.0398      0.6142 
REM Highest difference peak  0.340,  deepest hole -0.161,  1-sigma level  0.035
Q1    1   0.3020  0.2797  0.4581  11.00000  0.05    0.34
Q2    1   0.2807  0.2779  0.5308  11.00000  0.05    0.34
Q3    1   0.2979  0.3985  0.5738  11.00000  0.05    0.26
Q4    1   0.1977  0.2595  0.4637  11.00000  0.05    0.23
Q5    1   0.3567  0.2830  0.6002  11.00000  0.05    0.23
Q6    1   0.2752  0.1643  0.4888  11.00000  0.05    0.23
Q7    1   0.2490  0.2861  0.5951  11.00000  0.05    0.23
Q8    1   0.1982  0.4173  0.3744  11.00000  0.05    0.22
Q9    1   0.0698  0.2249  0.5239  11.00000  0.05    0.22
Q10   1   0.2998  0.3844  0.3963  11.00000  0.05    0.21
;
